# Supplementary material for: Engineering release kinetics with polyelectrolyte multilayers to modulate TLR signaling and promote immune tolerance
Source: Royal Society of Chemistry journal article supplement (doi:10.1039/c8bm01572d), 2019-01-01
Supplement: c8bm01572d1.pdf [file c8bm01572d1.pdf]

## Engineering release kinetics with polyelectrolyte multilayers to modulate TLR signalling and promote immune tolerance

Lisa H. Tostanoski, Haleigh B. Eppler, Boyan Xia, Xiangbin Zeng, and Christopher M. Jewell

### Supplementary Information

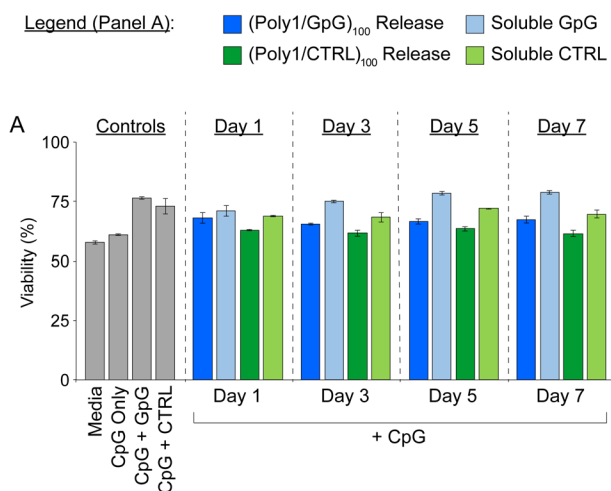

**Fig. S1** Degradable PEMs exhibit minimal impact on dendritic cell viability *in vitro*. Splenic DCs were isolated, incubated with media alone, soluble CpG, or soluble CpG with the addition of GpG or CTRL, either in release solutions from PEM-coated substrates incubated for indicated intervals, or as dose-matched soluble controls. The GpG or CTRL doses for days 1, 3, 5, and 7, were 1.30  $\mu$ g, 4.13  $\mu$ g, 8.20  $\mu$ g, and 11.30  $\mu$ g, respectively. (A) Viability was assessed as the fraction of DAPI<sup>+</sup> cells detected by flow cytometry after 16 h of incubation. Values in all panels indicate mean  $\pm$  SEM of studies conducted in triplicate.
